# Supplementary material for: The alr-groEL1 operon in Mycobacterium tuberculosis: an interplay of multiple regulatory elements
Source: PubMed Central journal article supplement (PMC5335608; doi:10.1038/srep43772), 2017-03-03
Supplement: srep43772-s1.pdf [file srep43772-s1.pdf]

## Supplementary Material

### The *alr-groEL1* operon in *Mycobacterium tuberculosis*: an interplay of multiple regulatory elements

Aadil H. Bhat, Deepika Pathak and Alka Rao<sup>#</sup>

Correspondence: Rao, A: [raoalka@imtech.res.in](mailto:raoalka@imtech.res.in)

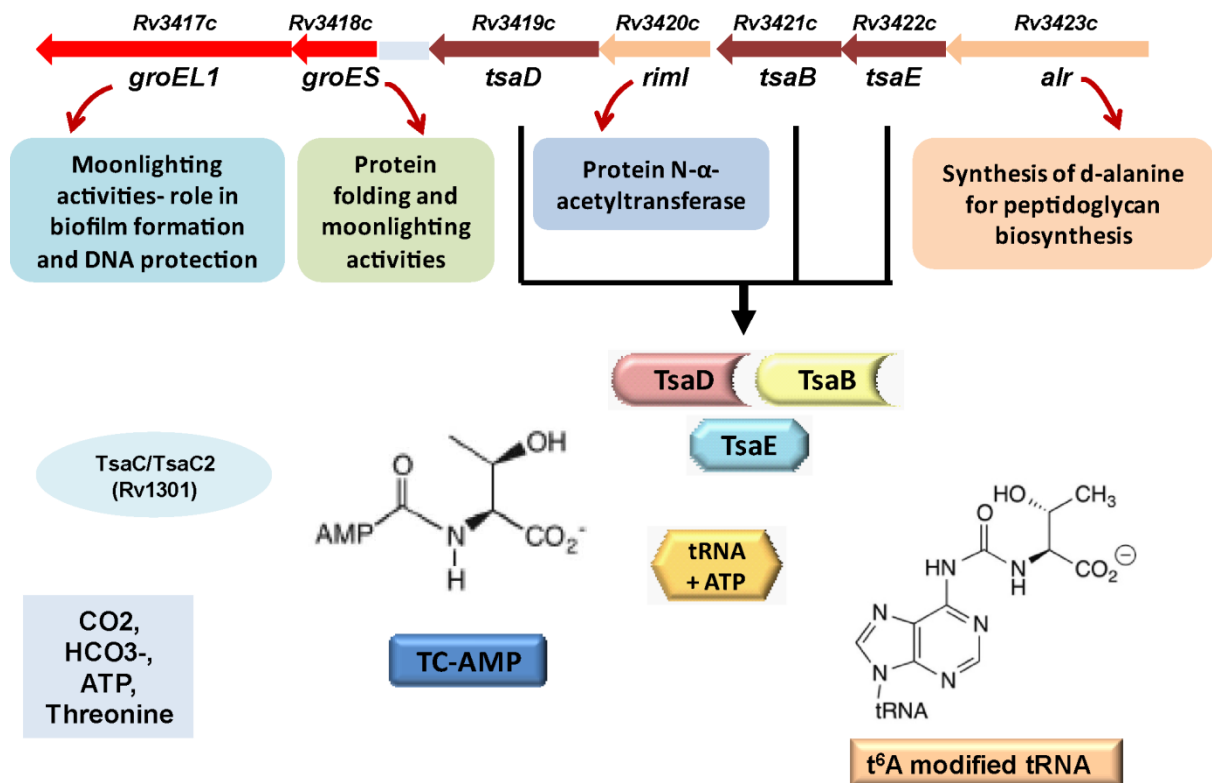

**Supplementary Figure S1.** Genetic and functional context of homologs of tRNA-A37-t<sup>6</sup>A biosynthesis machinery in *M. tuberculosis*. Adapted from Thiaville (P. C. Thiaville, D. Iwata-Reuyl, V. de Crécy-Lagard, RNA Biol 11:1529-39, 2014, doi: 10.4161/15476286.2014.992277).

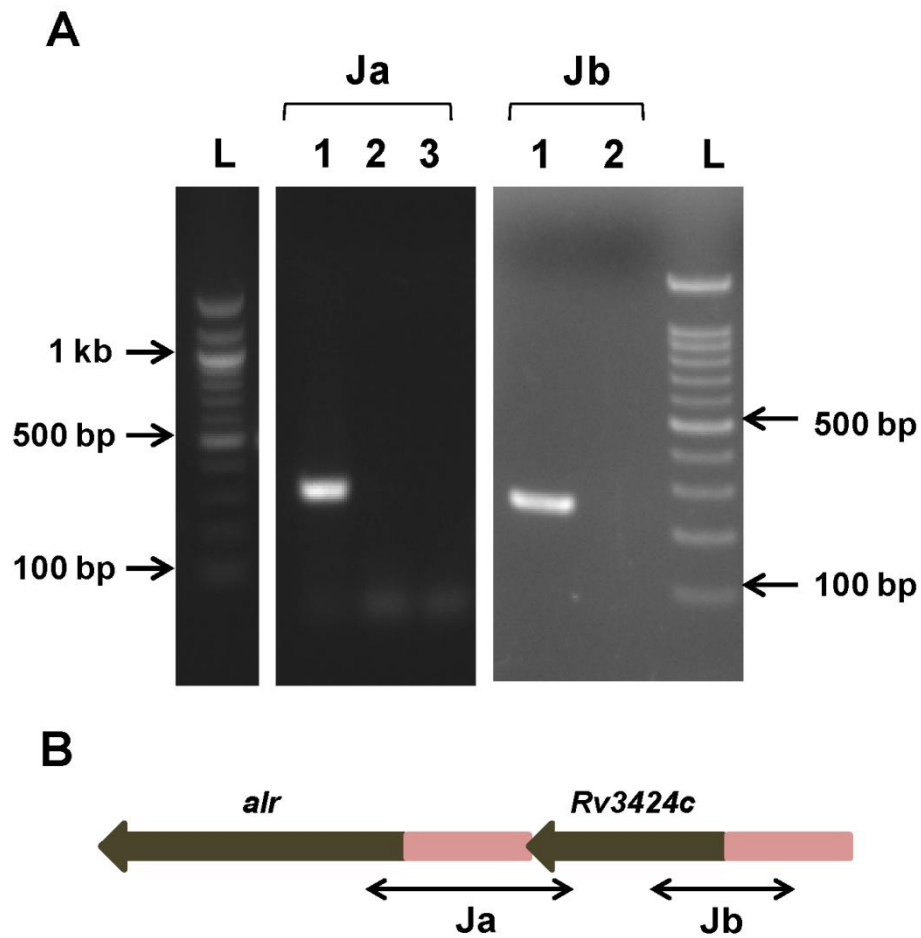

**Supplementary Figure S2.** RT-PCR of junction between *Rv3423c* (*alr*) and *Rv3424c* using additional primers for unambiguous identification of beginning of the operon (*alr-groEL1*). Panel **A** shows PCR amplified products from genomic DNA template (lane 1 in Ja section), cDNA template (lane 2 in Ja and lane 1 in Jb section) and RT- control (lane 3 in Ja section and lane 2 in Jb section). Combinations of primers used to amplify cDNA at gene-intergene junctions are shown in panel **B** (Supplementary Table S1).

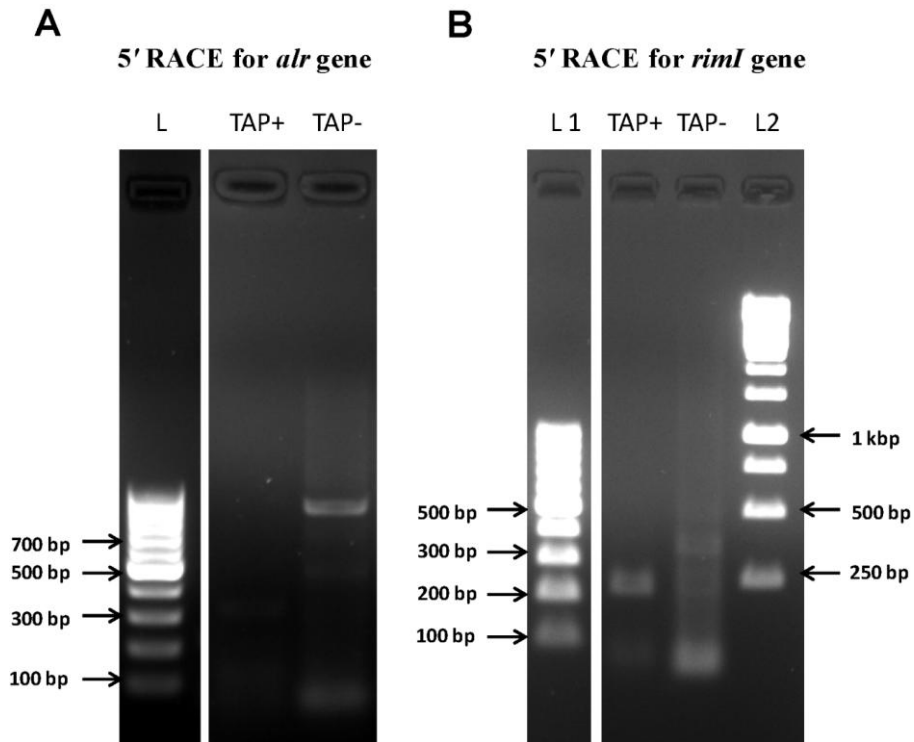

**C**

TSS 'G' at -263 position relative to GTG codon of *alr* gene

gcg<sup>ttgatggtg</sup>cg<sup>aagcg</sup>accg<sup>ccaaagccc</sup>ata<sup>cccg</sup>tgc<sup>agTGA</sup>tg<sup>ca</sup>cggg<sup>cg</sup>caa  
TAGGTTcacttcccccg<sup>G</sup>aactg<sup>cg</sup>gcag<sup>tct</sup>aggg<sup>cg</sup>aatag<sup>taca</sup>caactg<sup>ca</sup>actg<sup>t</sup>t  
t<sup>cct</sup>gcc<sup>ac</sup>ggg<sup>t</sup>gat<sup>gg</sup>cc<sup>gc</sup>ggt<sup>ca</sup>ag<sup>tac</sup>g<sup>tccc</sup>gt<sup>ca</sup>att<sup>cat</sup>g<sup>cc</sup>gg<sup>cc</sup>gat  
cc<sup>g</sup>ca<sup>ct</sup>t<sup>tatt</sup>g<sup>ac</sup>g<sup>cca</sup>acc<sup>at</sup>cat<sup>g</sup>cg<sup>gc</sup>acc<sup>gg</sup>ca<sup>at</sup>ct<sup>g</sup>ag<sup>cc</sup>aa<sup>ac</sup>acc<sup>gg</sup>gt<sup>g</sup>  
at<sup>cg</sup>g<sup>ca</sup>acc<sup>aa</sup>acc<sup>ac</sup>cg<sup>ag</sup>cc<sup>ac</sup>agg<sup>ac</sup>ag<sup>tca</sup>cg<sup>cc</sup>g<sup>ac</sup>ac<sup>gg</sup>ct<sup>g</sup>c<sup>ag</sup>ccc<sup>ag</sup>c<sup>acc</sup>  
g<sup>cg</sup>acc<sup>cg</sup>ggg<sup>ca</sup>at<sup>cg</sup>gg<sup>ca</sup>c<sup>ag</sup>g<sup>cc</sup>g<sup>ga</sup>ata<sup>ct</sup>g<sup>tca</sup><sup>GTG</sup>aa<sup>ac</sup>g<sup>gtt</sup>ct<sup>g</sup>gg<sup>g</sup>ag<sup>aa</sup>

**D**

TSS 'T' at -275 position relative to ATG codon of *tsaD* gene

at<sup>ct</sup>tc<sup>gc</sup>cg<sup>gc</sup>cg<sup>gat</sup>g<sup>cca</sup>ag<sup>cc</sup>g<sup>ct</sup>gg<sup>cg</sup>g<sup>tt</sup>g<sup>ca</sup>c<sup>GTG</sup>ac<sup>gg</sup>cc<sup>g</sup>ac<sup>acc</sup>g<sup>ag</sup>cc  
cg<sup>t</sup>ca<sup>cc</sup>at<sup>cg</sup>g<sup>cg</sup>cg<sup>ct</sup>g<sup>ac</sup>g<sup>cg</sup>cg<sup>cg</sup>g<sup>ac</sup>g<sup>ccc</sup>ag<sup>cg</sup>gt<sup>g</sup>cg<sup>cc</sup>g<sup>ag</sup>ct<sup>g</sup>g<sup>ag</sup>g<sup>cc</sup>ca  
g<sup>ct</sup>g<sup>tt</sup>cg<sup>tc</sup>g<sup>gt</sup>g<sup>ac</sup>g<sup>at</sup>cc<sup>ct</sup>g<sup>g</sup>cc<sup>gc</sup>g<sup>g</sup>cg<sup>g</sup>cg<sup>gt</sup>t<sup>ca</sup>acc<sup>g</sup>cg<sup>aa</sup>act<sup>g</sup>g<sup>cc</sup>ag<sup>ccc</sup>  
g<sup>ca</sup>ca<sup>acc</sup>act<sup>at</sup>g<sup>t</sup>gg<sup>t</sup>g<sup>cg</sup>cg<sup>cag</sup>cg<sup>gt</sup>gg<sup>cac</sup>g<sup>ct</sup>g<sup>gt</sup>cg<sup>gt</sup>TACGCTg<sup>ga</sup>at<sup>c</sup>T  
g<sup>cg</sup>g<sup>tt</sup>gg<sup>g</sup>cc<sup>g</sup>aa<sup>acc</sup>g<sup>cc</sup>g<sup>tt</sup>cg<sup>ag</sup>t<sup>ac</sup>g<sup>ag</sup>gt<sup>g</sup>ca<sup>acc</sup>at<sup>cg</sup>g<sup>cg</sup>tg<sup>g</sup>acc<sup>gg</sup>g<sup>c</sup>  
ct<sup>acc</sup>ag<sup>gg</sup>g<sup>cg</sup>gg<sup>g</sup>cat<sup>cg</sup>g<sup>cc</sup>g<sup>tc</sup>g<sup>gt</sup>t<sup>g</sup>ct<sup>g</sup>cg<sup>cg</sup>ga<sup>act</sup>g<sup>ct</sup>g<sup>g</sup>act<sup>tt</sup>g<sup>cc</sup>ag<sup>gg</sup>g  
t<sup>g</sup>gt<sup>g</sup>tg<sup>gt</sup>t<sup>ac</sup>ct<sup>g</sup>g<sup>ag</sup>gt<sup>cc</sup>g<sup>ac</sup>cg<sup>ata</sup>at<sup>g</sup>ac<sup>g</sup>cc<sup>g</sup>ct<sup>ct</sup>t<sup>g</sup>cg<sup>ct</sup>g<sup>t</sup>at<sup>cg</sup>ag  
cg<sup>t</sup>gg<sup>g</sup>att<sup>cc</sup>ag<sup>cg</sup>gg<sup>tc</sup>g<sup>g</sup>ct<sup>t</sup>g<sup>cg</sup>cc<sup>gg</sup>cg<sup>at</sup>att<sup>acc</sup>gg<sup>gt</sup>c<sup>ag</sup>cg<sup>g</sup>cg<sup>cc</sup>g<sup>ac</sup>g<sup>c</sup>  
g<sup>t</sup>ac<sup>ac</sup>g<sup>at</sup>g<sup>cg</sup>t<sup>agg</sup>g<sup>att</sup>cg<sup>gg</sup>g<sup>g</sup>acc<sup>g</sup>ct<sup>c</sup><sup>ATG</sup>ac<sup>g</sup>ac<sup>ag</sup>t<sup>ct</sup>t<sup>g</sup>gg<sup>g</sup>cat<sup>cg</sup>aa<sup>acc</sup>

**Supplementary Figure S3.** Transcription start site mapping using 5' RLM RACE. RACE was done with *M. tuberculosis* H37Rv total RNA using random hexamers in cDNA synthesis. Two reactions were performed in parallel, one was TAP-treated (TAP+) while the other one (TAP-) was kept as mock. Bands from TAP+ reactions were sequenced. RACE products obtained using 5' generacer and Rv23R (**A**) or TsaDUR (**B**) reverse primers. Rv23R primer was designed complimentary to the region just downstream of *alr* GTG start codon while TsaDUR primer was designed at the start codon of *tsaD* gene. TSS was identified as G base at -263 position relative to start codon of *alr* (**C**) and as base T at -275 position with respect to the *tsaD* start codon (**D**). TSSs and the associated -10 hexamer sequences are shown as bold underlined uppercase letters.

**Transcription start site (TSS upstream of *alr* gene) mapping attempted with Primer Extension Analysis (PEA)**

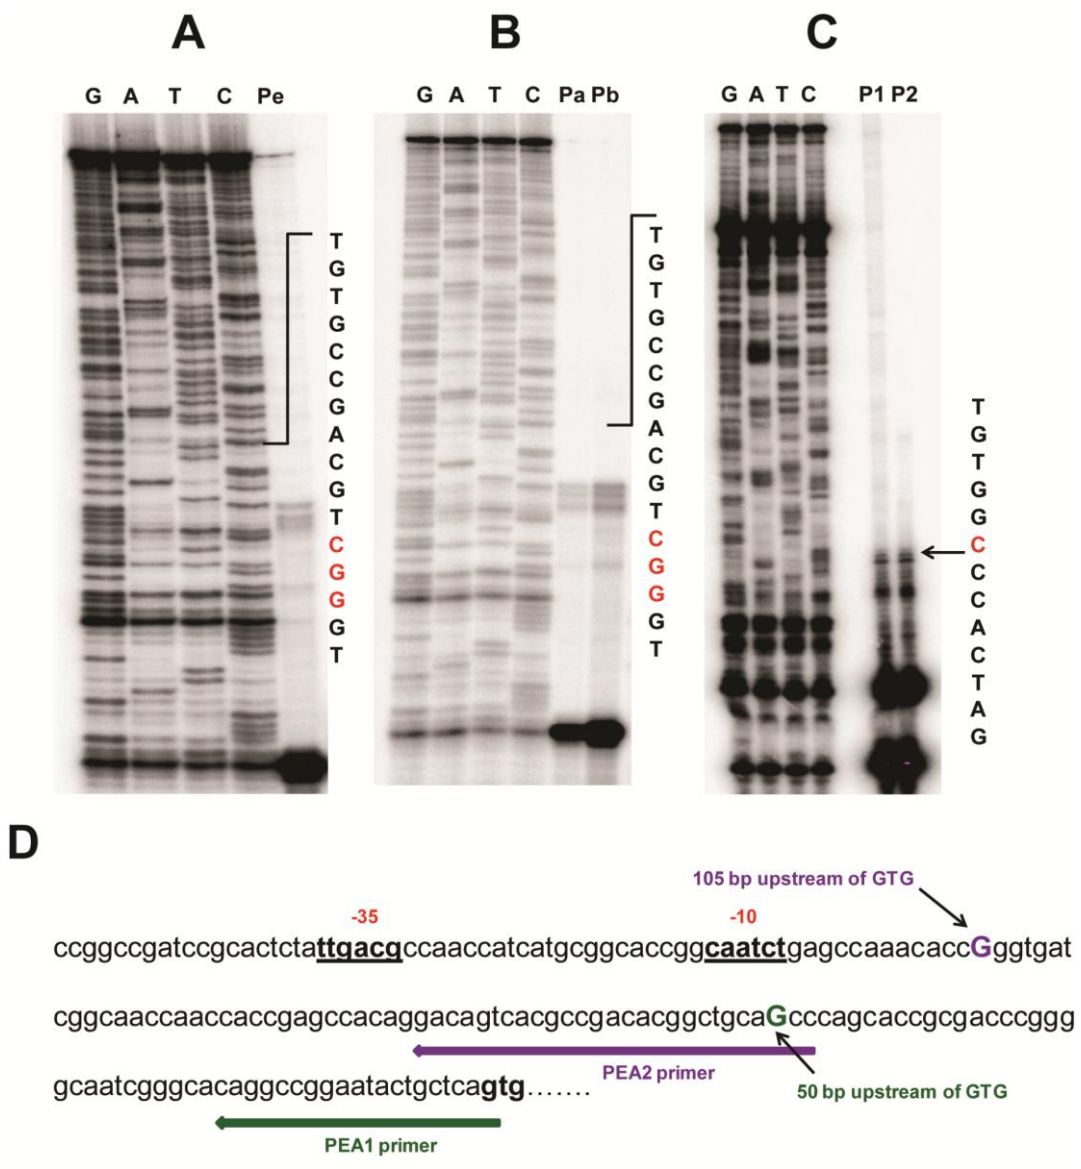

**Supplementary Figure S4.** Identification of Transcription start site (TSS) using primer extension analysis (PEA) of total RNA isolated from exponential phase *M. tuberculosis* H37Rv. Different primers were designed against the upstream region of the *alr* gene and radiolabeled at 5' ends. PE was performed at different temperatures. **(A)** PE reaction done at 50°C (lane Pe) using PEA1 primer, **(B)** PE reaction carried out at 58°C (lane Pa) and 60°C (lane Pb) using PEA1 primer, **(C)** PE reaction done at 63°C (in duplicate in lanes P1, P2)

using PEA2 primer that overlaps the PEA1 extended product and extends further upstream of PEA1 primer. PEA1 (5'- GTTCATCGATCTGAGCAGTATTCCGGCCTG); PEA2 (5'- GGCTGCAGCCGTGTCGGCGTGACTGTC). Panel **D** shows the position of primer binding in the upstream region of the *alr* gene. See note below for Methodology.

**Note: Methodology of Primer Extension Analysis**

The radiolabeled oligonucleotides were extended with reverse transcriptase to form a single stranded DNA using the standard protocol<sup>44</sup>. Nearly 5 µg total RNA from *M. tuberculosis* H37Rv was purified and denatured at 70°C for 15 min. Antisense primers were designed against the 5' region of the *alr* gene and end-labeled with [ $\gamma$ -P<sup>32</sup>] ATP using T4 polynucleotide kinase (Fermentas). A 30-mer PEA1 primer (5'- GTTCATCGATCTGAGCAGTATTCCGGCCTG) was complimentary to nucleotide positions -29 to 1 bp starting from the initiation codon while another 23-mer PEA2 (5'- GCAGCCGTGTCGGCGTGACTGTC) primer was complimentary to -52 to -75 bp nucleotide positions upstream of start codon. Two picomoles of radiolabeled primer were added to the denatured RNA and hybridized for at least 3 h at 55°C. RNA/primer hybrids were resuspended in primer extension buffer subsequent to precipitation with sodium acetate and ethanol. Maxima reverse transcriptase was then added to extend the primers at 58°C or 60°C or 63°C for 1 h. Primer extension product was purified with phenol/chloroform/isoamyl alcohol. The product was analyzed on a 6% denaturing polyacrylamide gel containing 7 M urea, with the help of a labeled sequencing ladder (GATC) made using the same radiolabeled primer.

**A**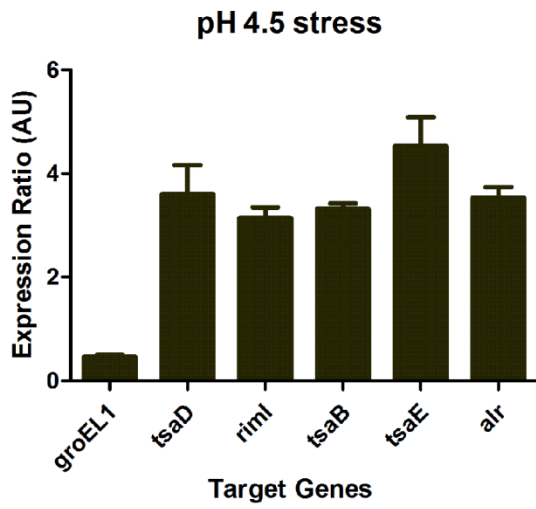**B**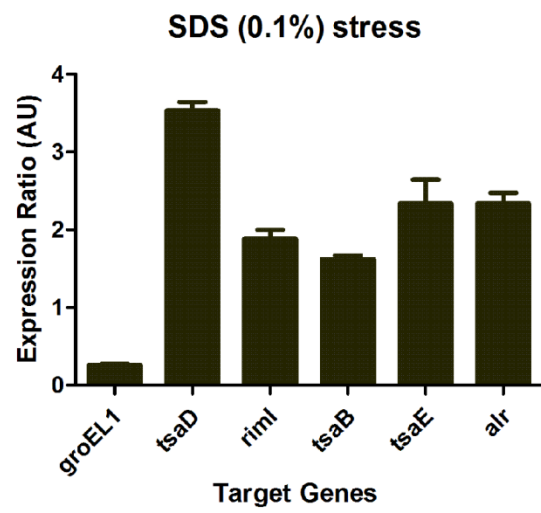**C**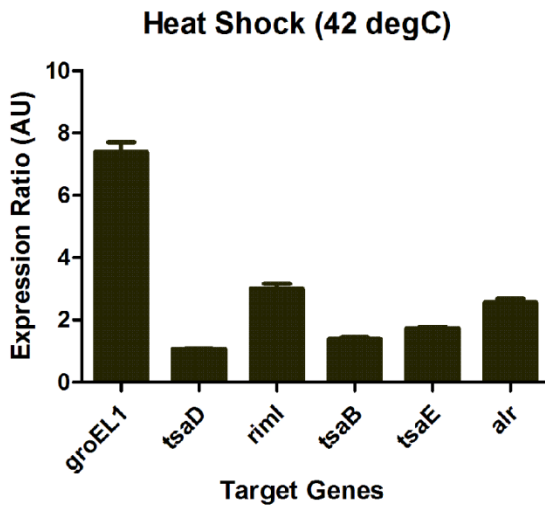**D**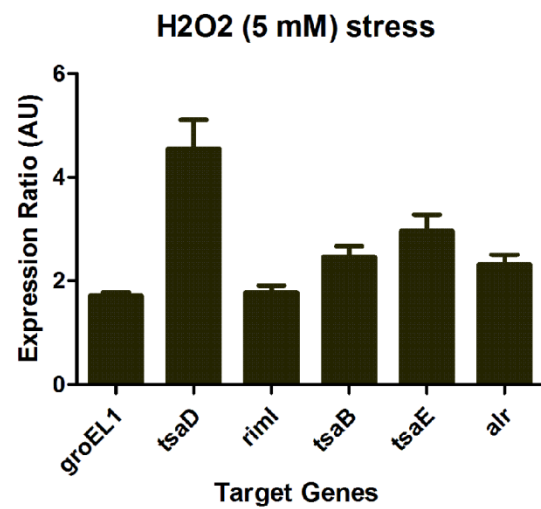**E**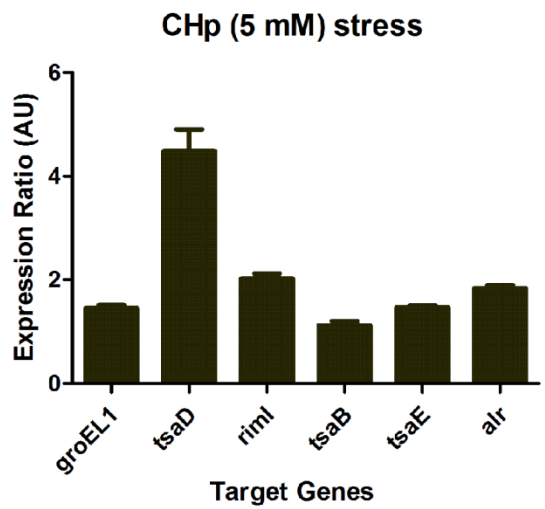**F**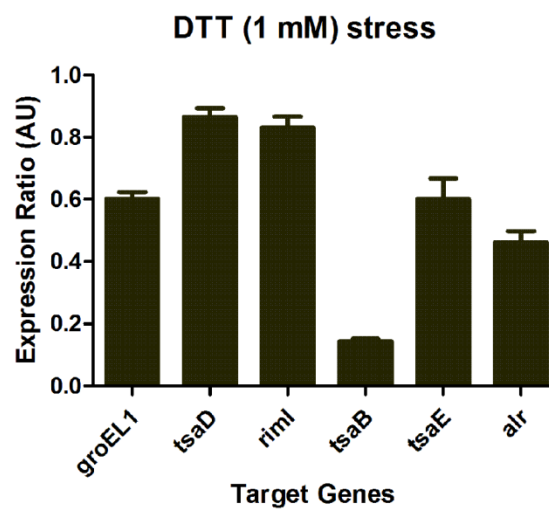

**Supplementary Figure S5.** Relative expression of the constituent genes of the *alr-groEL1* operon under various stress conditions. RT-qPCR was done on total RNA isolated from *M. tuberculosis* H37Rv cultures, subjected to various stresses including heat shock at 42°C, SDS (0.1%), pH 4.5, H<sub>2</sub>O<sub>2</sub> (5 mM), cumene hydroperoxide (5 mM), DTT (1 mM). In all cases, the bacteria were kept under stress for approx. 2 h except for heat shock which was given for 30 min. The results (fold change observed) were normalized to the expression of the 16S rRNA reference gene. The results shown are the representative of three independent experiments (with P value  $\leq 0.05$ ) done in triplicates. The qPCR results were analyzed using REST 2009 software version 1 (MW. Pfaffl, GW. Horgan, L. Dempfle, Nucleic Acids Res 30, e36, 2002, doi: 10.1093/nar/30.9.e36).

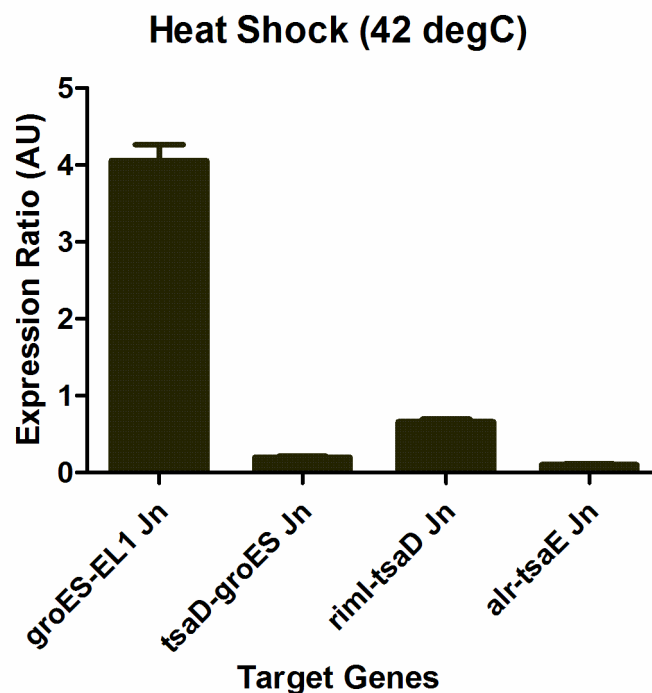

**Supplementary Figure S6.** Relative expression of different junctions of *alr-groEL1* operon under heat shock at 42°C for 30 min. The bars represent fold change in treated samples relative to control sample. The data shown is the representative of two independent experiments, each performed in triplicate. Mean  $\pm$  SEM is plotted for each sample.



**Supplementary Table S1. Primers used in this study.**

| No. | Primer | Sequence                                    | Used for                                        |
|-----|--------|---------------------------------------------|-------------------------------------------------|
| 1   | JP1F   | 5'- GCACCGCAATCTGAGCCAAAC - 3'              |                                                 |
| 2   | JP1R   | 5'- CGGTGCGGTAATGCCATCAG - 3'               |                                                 |
| 3   | JP2F   | 5'- CGAAGGCGACGAGGCGATTT - 3'               |                                                 |
| 4   | JP2R   | 5'- TACCCTTGGCCAGCACCGTCTT - 3'             |                                                 |
| 5   | JP3F   | 5' - CGACTGCTGGACCACAACAG - 3'              |                                                 |
| 6   | JP3R   | 5' - GTCCAGGTCGGCCATTGTGA - 3'              |                                                 |
| 7   | JP4F   | 5'- TCTGGTAGCCGCGGTGAACT - 3'               |                                                 |
| 8   | JP4R   | 5'- CCGAACATGCTCGTCGACAC - 3'               |                                                 |
| 9   | JP5F   | 5'- CGCGGACGTGTTGACCATGAAG - 3'             | Reverse<br>Transcription<br>PCR                 |
| 10  | JP5R   | 5'- ACCAGGTGATTCGGCATTTCG - 3'              |                                                 |
| 11  | JP6F   | 5'- TGGCAATCGGCTAACCCCTG                    |                                                 |
| 12  | JP6R   | 5'- CGTGCCGACAGGATCAGGTA                    |                                                 |
| 13  | JP7F   | 5'- GGAGGGTGACACCGTCATCT                    |                                                 |
| 14  | JP7R   | 5'- AGTGCCTGCGCCAAGATGGT                    |                                                 |
| 15  | JP8F   | 5'- CTCGGTGGTGGTCAACAAGG                    |                                                 |
| 16  | JP8R   | 5'- CCTACTCCTCAAGGGCACCA                    |                                                 |
| 17  | 16S F  | 5'- GTGGCGAACGGGTGAGTAAC - 3'               |                                                 |
| 18  | 16S R  | 5'- CATCAGGCTTGCGCCATTG - 3'                |                                                 |
| 19  | JaF    | 5'- AAGTAAGCTTCACTGTCGGCGTTGATG             |                                                 |
| 20  | JaR    | 5'- GTTCATCGATCTGAGCAGTATTCCGGCCTG          | RT-PCR of 5'<br>end of alr gene<br>and upstream |
| 21  | JbF    | 5'- GTCTGCTGTGCCGGTTTGGTCT                  |                                                 |
| 22  | JbR    | 5'- GATCCCGGTGGTCAACGCTA                    |                                                 |
| 23  | AlrU1F | 5'- GCACT <u>CTAGA</u> AGCGGCCTCATCCCTATTC  | Promoter<br>Cloning                             |
| 24  | AlrU2F | 5'- GCACT <u>CTAGAT</u> AGCCGCGTTGTCCAATGC  |                                                 |
| 25  | AlrU3F | 5'- TCACT <u>CTAGAC</u> GCTCCCGTCAATTCATGC  |                                                 |
| 26  | AlrU4F | 5'- TCACT <u>CTAGA</u> ACAGGACAGTCACGCCGACA |                                                 |
| 27  | AlrUR  | 5'- GTTCA <u>AGCTT</u> CTGAGCAGTATTCCGGCCTG |                                                 |

---

|    |          |                                               |
|----|----------|-----------------------------------------------|
| 28 | TsaEU1F  | 5'- TCACT <u>CTAG</u> ACGGCGATGACCGTGAAATGTG  |
| 29 | TsaEU2F  | 5'- GCACT <u>CTAG</u> ACCACGCGACACCAATCTGGC   |
| 30 | TsaEUR   | 5'- GTTCA <u>AGCTT</u> GATACCCTCACGGCTCAACG   |
| 31 | RimIU1F  | 5'- TCACT <u>CTAG</u> ATTAGCCACTCCGACACCAGGAT |
| 32 | RimIU2F  | 5'- CTAGT <u>CTAG</u> ATCACAATGGCCGACCTGGAC   |
| 33 | RimIU3F  | 5'- TCACT <u>CTAG</u> AGCAAACCATCGGTGACACGC   |
| 34 | RimIU4F  | 5'- CTACT <u>CTAG</u> AGGGATTTCGTACGGTCGGACC  |
| 35 | RimIU5F  | 5'- CTAGT <u>CTAG</u> ACTGGTAGCCGCGGTGAACTG   |
| 36 | RimIUR   | 5'- GTTCA <u>AGCTT</u> ATGGTGACGGGCTCGGTGTC   |
| 37 | TsaDU1F  | 5'- CTAGT <u>CTAG</u> AGCTGGCGGTTTGACGTGAC    |
| 38 | TsaDU2F  | 5'- GCACT <u>CTAG</u> AGCTGGTTCGGTTACGCTGGAAT |
| 39 | TsaDU3F  | 5'- GCACT <u>CTAG</u> AGATAATGACGCCGCTCTTGC   |
| 40 | TsaDUR   | 5'- GTTCA <u>AGCTT</u> ACTGTTCGTCATGACGGGTCC  |
| 41 | GroESU1F | 5'- CTACT <u>CTAG</u> ACCGAGTGTGTGGCGTTGTTG   |
| 42 | GroESU2F | 5'- GCACT <u>CTAG</u> ACGGACATTGCACCTGGCGTA   |
| 43 | GroESUR  | 5'- GTTCA <u>AGCTT</u> TACCTTCGCCACGATTGGAG   |
| 44 | Qt23F    | 5'- CGGTGACCGTCAAGGTGGATAC                    |
| 45 | Qt23R    | 5'- TCGTCAGGCTTGTTCGGCGTAA                    |
| 46 | Qt22F    | 5'- GACCTGCTGAGTGAGCTGGACT                    |
| 47 | Qt22R    | 5'- TCCTGGTGTCGGAGTGGCTAAC                    |
| 48 | Qt21F    | 5'- CCGCGTGCAAATAAGCACCGTC                    |
| 49 | Qt21R    | 5'- CACGTTGGGAGTCAGCCGTT                      |
| 50 | Qt20F    | 5'- ACACCGCCGTTTCGAGTACGA                     |
| 51 | Qt20R    | 5'- TCATTATCGGTGCGGACCTCCA                    |
| 52 | Qt19F    | 5'- CCGCTATGCGTTCAGCTTCTCC                    |
| 53 | Qt19R    | 5'- CCGTACCGCCTTCATGGTCAAC                    |
| 54 | Qt17F    | 5'- TGGGCACCGAGTTGGAGTTCA                     |
| 55 | Qt17R    | 5'- CGGGAAGCGAGCTGATCTTGTC                    |
| 56 | Qt24F    | 5'- TTAGCCGCGTTGTCCAATGCC                     |
| 57 | Qt24R    | 5'- CGGTCGCTTCGCACCATCAA                      |

---

RT-qPCR

|    |            |                                              |                       |
|----|------------|----------------------------------------------|-----------------------|
| 58 | Qt16SF     | 5'- AGCGGCGGAGCATGTGGATTA                    |                       |
| 59 | Qt16SR     | 5'- CCCAACATCTCACGACACGAGC                   |                       |
| 60 | Rv23_terF  | 5'- CTAGCATATGGTGACCGTCAAGGTGGATAC           |                       |
| 61 | Rv23_terR  | 5'- TCGTCAGGCTTGTCGGCGTAA                    |                       |
| 62 | Rv19_terF  | 5'- TCGACATATGGACATTGCACCTGGCGTAC            | Terminator<br>Cloning |
| 63 | Rv19_terCF | 5'- GGACGAATGCCGAATCACCTGG                   |                       |
| 64 | Rv19_terR  | 5'- CCACGATTGGAGCCCTCCAC                     |                       |
| 65 | TsynA      | 5'- AGAAAAAAAAAAGCCCCGCGATTGCGGGGCTTTTTTTTTT |                       |
| 66 | TtrpA      | 5'- AGCCCGCCTAATGGCGGGCTTTTTTTTT             |                       |

**Supplementary Table S2. Transcription Start Sites (TSSs) identified in the *alr-groEL1* operon**

| Name of Gene | TSS | Position on Genome | Position relative to start codon of downstream gene | Method used to identify the TSS | Reference                                                   |
|--------------|-----|--------------------|-----------------------------------------------------|---------------------------------|-------------------------------------------------------------|
| Rv3418c      | G   | 3837458            | 170 bp                                              | RNA-seq                         | Cortes et al. <sup>3</sup><br>and Shell et al. <sup>2</sup> |
| Rv3418c      | T   | 3837459            | 171 bp                                              | Primer Extension                | Aravindhan et al. <sup>1</sup>                              |
| Rv3418c      | C   | 3837524            | 236 bp                                              | Primer Extension                | Aravindhan et al. <sup>1</sup>                              |
| Rv3419c      | T   | 3838864            | 275 bp                                              | RNA-seq                         | Cortes et al. <sup>3</sup><br>and Shell et al. <sup>2</sup> |
| Rv3419c      | T   | 3838864            | 275 bp                                              | 5' RLM-RACE                     | This study                                                  |
| Rv3420c      | A   | 3839615            | 553 bp                                              | RNA-seq                         | Shell et al. <sup>2</sup>                                   |
| Rv3422c      | A   | 3841394            | 1197 bp                                             | RNA-seq                         | Cortes et al. <sup>3</sup><br>and Shell et al. <sup>2</sup> |
| Rv3422c      | G   | 3841418            | 1221 bp                                             | RNA-seq                         | Shell et al. <sup>2</sup>                                   |
| Rv3423c      | A   | 3841843            | 423 bp                                              | RNA-seq                         | Cortes et al. <sup>3</sup>                                  |
| Rv3423c      | G   | 3841684            | 263 bp                                              | 5' RLM-RACE                     | This study                                                  |

**Supplementary Table S3. Detailed description of individual regulatory elements of *alr-groEL1* operon**

| Promoter elements                                                  |                                           |                           |                    |           |                                                                                                                |                                             |                               |                          |                            |
|--------------------------------------------------------------------|-------------------------------------------|---------------------------|--------------------|-----------|----------------------------------------------------------------------------------------------------------------|---------------------------------------------|-------------------------------|--------------------------|----------------------------|
| S. No                                                              | Name of Promoter Fragments                | Downstream Gene Regulated | Position on Genome | Size (bp) | [-10 TANNNT consensus]/ (general bacterial -10 box) <sup>a</sup>                                               | Position of -10 box <sup>b</sup>            | TSS <sup>c</sup> (bp)         | Putative TF <sup>d</sup> | Source/Reference           |
| 1                                                                  | pCVAlrU1                                  | Rv3423c                   | 3841420-2004       | 584       | CAA[TAGGTT]                                                                                                    | 274 bp                                      | G at -263                     | Rv1033c                  | This study                 |
| 2                                                                  | pCVAlrU2 <sup>g</sup>                     | Rv3423c                   | 3841420-1886       | 466       | CAA[TAGGTT]                                                                                                    | 274 bp                                      | G at -263                     | Rv1033c                  | This study                 |
| 3                                                                  | pCVAlrU3                                  | Rv3423c                   | 3841420-1608       | 188       | -                                                                                                              | -                                           | -                             | Rv1033c                  | This study                 |
| 4                                                                  | pCVAlrU4                                  | Rv3423c                   | 3841420-1499       | 79        | -                                                                                                              | -                                           | -                             | Rv1033c                  | This study                 |
| 5                                                                  | pCVTsaEU1 <sup>g</sup>                    | Rv3422c                   | 3840197-0621       | 424       | TGG(TGAAAT)                                                                                                    | 367 bp                                      | -                             | Rv0047c                  | This study                 |
| 6                                                                  | pCVTsaEU2                                 | Rv3422c                   | 3840197-0535       | 338       | -                                                                                                              | -                                           | -                             | Rv0047c                  | This study                 |
| 7                                                                  | pCVRimIU1                                 | Rv3420c                   | 3839062-9787       | 725       | [TATCTT]                                                                                                       | 35 bp                                       | -                             | Rv0967                   | This study                 |
| 8                                                                  | pCVRimIU2                                 | Rv3420c                   | 3839062-9545       | 483       | [TATCTT]                                                                                                       | 35 bp                                       | -                             | Rv0967                   | This study                 |
| 9                                                                  | pCVRimIU3                                 | Rv3420c                   | 3839062-9397       | 335       | [TATCTT]                                                                                                       | 35 bp                                       | -                             | Rv0967                   | This study                 |
| 10                                                                 | pCVRimIU4                                 | Rv3420c                   | 3839062-9324       | 262       | [TATCTT]                                                                                                       | 35 bp                                       | -                             | Rv0967                   | This study                 |
| 11                                                                 | pCVRimIU5 <sup>g</sup>                    | Rv3420c                   | 3839062-9182       | 120       | [TATCTT]                                                                                                       | 35 bp                                       | -                             | Rv0967                   | This study                 |
| 12                                                                 | pCVGroESU1                                | Rv3418c                   | 3837288-8214       | 926       | <b>TATAGA</b>                                                                                                  | 179 bp                                      | <b>T at - 171</b>             | Rv2374c                  | This study/ <sup>1</sup>   |
| 13                                                                 | pCVGroESU2                                | Rv3418c                   | 3837288-7565       | 277       | <b>TATAGA</b>                                                                                                  | 179 bp                                      | <b>T at - 171</b>             | Rv2374c                  | This study/ <sup>1</sup>   |
| 14                                                                 | pCVTsaDU1                                 | Rv3419c                   | 3838589-9089       | 500       | <i>GGT[TACGCT]</i>                                                                                             | 281 bp                                      | <i>T at - 275</i>             | Rv0967                   | This study/ <sup>2,3</sup> |
| 15                                                                 | pCVTsaDU2 <sup>g</sup>                    | Rv3419c                   | 3838589-8899       | 310       | <i>GGT[TACGCT]</i>                                                                                             | 281 bp                                      | <i>T at - 275</i>             | Rv0967                   | This study/ <sup>2,3</sup> |
| 16                                                                 | pCVTsaDU3                                 | Rv3419c                   | 3838589-8729       | 140       | -                                                                                                              | -                                           | -                             | Rv0967                   | This study                 |
| I-shaped terminator (hairpin)-like <i>cis</i> -regulatory elements |                                           |                           |                    |           |                                                                                                                |                                             |                               |                          |                            |
| S. No.                                                             | Transcription Terminator or like Fragment | Upstream Gene Regulated   | Position on Genome | Size (bp) | Predicted Terminator Sequence [US (Right leg of Stem)- B (Bulb)- DS (Left Leg of Stem)- T (Tail)] <sup>e</sup> | Position (from stop codon present upstream) | Structure Type <sup>e,f</sup> | Other features           |                            |
| 1                                                                  | <b>TsaDF</b>                              | Rv3419c                   | 3837555-7432       | 123       | cgguuccgggg- cacg- ccccg(acc)gaccg- ccaacuccgg                                                                 | 178 bp                                      | I-shaped                      |                          |                            |

|   |               |         |              |     |                                                    |        |          |                                    |
|---|---------------|---------|--------------|-----|----------------------------------------------------|--------|----------|------------------------------------|
| 2 | <b>TtsaDR</b> | Rv3419c | 3837555-7280 | 275 | cgguuccgggg- cacg-<br>ccccgg(acc)gaccg- ccaacuccgg | 178 bp | I-shaped | Contains some promoter elements    |
| 3 | <b>CTalr</b>  | Rv3423c | 3840806-0962 | 156 | -                                                  | -      | -        | Coding sequence of <i>alr</i> gene |

- Not known/ Not detected

<sup>a</sup> Consensus TANNNT identified by motif discovery using MEME <sup>3</sup>. Consensus motif in bold was identified previously <sup>1</sup>.

<sup>b</sup> Position of -10 box with respect to translational start site.

<sup>c</sup> Italicized letters denote TSS annotated by genome wide TSS mapping using Illumina sequencing <sup>3</sup>. TSS in bold letters was determined previously <sup>1</sup>.

<sup>d</sup> ChIP sequence data from Minch KJ <sup>4</sup>.

<sup>e</sup> Data acquired from: Mitra et al., and Unniraman et al. <sup>5,6</sup>.

<sup>f</sup> Palindromic structures with non-canonical U-trails are termed I-shaped.

<sup>g</sup> Minimal promoter fragments identified in our study.

## References

1. Aravindhan, V. *et al.* Mycobacterium tuberculosis groE promoter controls the expression of the bicistronic groESL1 operon and shows differential regulation under stress conditions. *FEMS Microbiol. Lett.* **292**, 42–49 (2009).
2. Shell, S. S. *et al.* Leaderless Transcripts and Small Proteins Are Common Features of the Mycobacterial Translational Landscape. *PLoS Genet.* **11**, (2015).
3. Cortes, T. *et al.* Genome-wide mapping of transcriptional start sites defines an extensive leaderless transcriptome in Mycobacterium tuberculosis. *Cell Rep.* **5**, 1121–1131 (2013).
4. Minch, K. J. *et al.* The DNA-binding network of Mycobacterium tuberculosis. *Nat. Commun.* **6**, 1–10 (2015).
5. Mitra, A., Angamuthu, K. & Nagaraja, V. Genome-wide analysis of the intrinsic terminators of transcription across the genus Mycobacterium. *Tuberculosis (Edinb).* **88**, 566–75 (2008).
6. Unniraman, S., Prakash, R. & Nagaraja, V. Conserved economics of transcription termination in eubacteria. *Nucleic Acids Res.* **30**, 675–684 (2002).

**Supplementary Table S4. Expression values (Mean  $\pm$ SEM) used for heatmap generation**

|                          | <i>groEL1</i>        | <i>tsaD</i>           | <i>rimI</i>           | <i>tsaB</i>          | <i>tsaE</i>          | <i>alr</i>           |
|--------------------------|----------------------|-----------------------|-----------------------|----------------------|----------------------|----------------------|
| <b>pH 4.5 stress</b>     | -2.14<br>$\pm 0.13$  | 3.597<br>$\pm 0.571$  | 3.14<br>$\pm 0.212$   | 3.318<br>$\pm 0.111$ | 4.536<br>$\pm 0.549$ | 3.536<br>$\pm 0.203$ |
| <b>SDS 0.1% stress</b>   | -3.82<br>$\pm 0.17$  | 3.533<br>$\pm 0.108$  | 1.883<br>$\pm 0.116$  | 1.62<br>$\pm 0.047$  | 2.338<br>$\pm 0.306$ | 2.338<br>$\pm 0.138$ |
| <b>Heat Shock 42°C</b>   | 7.396<br>$\pm 0.314$ | 1.072<br>$\pm 0.014$  | 3.004<br>$\pm 0.162$  | 1.382<br>$\pm 0.062$ | 1.726<br>$\pm 0.056$ | 2.554<br>$\pm 0.122$ |
| <b>H2O2 5mM stress</b>   | 1.716<br>$\pm 0.066$ | 4.548<br>$\pm 0.562$  | 1.778<br>$\pm 0.135$  | 2.462<br>$\pm 0.211$ | 2.964<br>$\pm 0.317$ | 2.318<br>$\pm 0.187$ |
| <b>CuH2O2 5mM stress</b> | 1.456<br>$\pm 0.058$ | 4.482<br>$\pm 0.418$  | 2.03<br>$\pm 0.094$   | 1.124<br>$\pm 0.082$ | 1.47<br>$\pm 0.039$  | 1.843<br>$\pm 0.054$ |
| <b>DTT 1mM stress</b>    | -1.661<br>$\pm 0.06$ | -1.156<br>$\pm 0.039$ | -1.203<br>$\pm 0.052$ | -6.94<br>$\pm 0.34$  | -1.67<br>$\pm 0.18$  | -2.16<br>$\pm 0.170$ |
